# Supplementary material
Source: PubMed Central journal article supplement (PMC5820703)
Supplement: jama-e1718718-s002.pdf [file jama-e1718718-s002.pdf]

## Supplementary Online Content

Stupp R, Taillibert S, Kanner A, et al. Effect of tumor-treating fields plus maintenance temozolomide vs maintenance temozolomide alone on survival in patients with glioblastoma: a randomized clinical trial. *JAMA*. doi:10.1001/jama.2017.18718

**eAppendix 1.** Listing of all participating centers and local principal investigators

This supplementary material has been provided by the authors to give readers additional information about their work.

**eAppendix 1.** Listing of all participating centers and local principal investigators

|                                                                           |                                                                                   |
|---------------------------------------------------------------------------|-----------------------------------------------------------------------------------|
| Sophie Taillibert and Ahmed Idbaih                                        | France   Paris   Hôpital Universitaire Pitié-Salpêtrière                          |
| Andrew A. Kanner and Zvi Ram                                              | Israel   Tel Aviv   Tel Aviv Medical Center                                       |
| Santosh Kesari and William Reed                                           | USA   San Diego, CA   Univ. of California San Diego (UCSD)                        |
| Steven A. Toms                                                            | USA   Danville, PA   Geisinger Health System                                      |
| Gene H. Barnett, Manmeet S. Ahluwalia                                     | USA   Cleveland, OH   Cleveland Clinic Foundation (CCF)                           |
| Karen L. Fink                                                             | USA   Dallas, TX   Baylor University Medical Center                               |
| Antonio Silvani                                                           | Italy   Milan   Istituto Nazionale Neurologico Carlo Besta                        |
| Francesco Di Meco, Andrea Salmaggi, Antonio Silvani                       | Italy   Milan   Istituto Nazionale Neurologico Carlo Besta                        |
| Frank Lieberman                                                           | USA   Pittsburgh, PA   University of Pittsburgh Medical Center (UPMC)             |
| Jay- Jiguang Zhu                                                          | USA   Houston, TX   University of Texas Health Sciences Ctr at Houston (UTHealth) |
| John S. Nystrom, Steven Hwang, Lynne P. Taylor, Suriya Jeyapalan, Jay Zhu | USA   Boston, MA   Tufts Medical Center                                           |
| Jerome Honnorat                                                           | France   Lyon   Neurological Hospital of Lyon                                     |
| Jan Sroubek                                                               | Czech Republic   Prague   Na Homolka Hospital                                     |
| Andreas F. Hottinger and Roger Stupp                                      | Switzerland   Lausanne   CHUV                                                     |
| Thomas C. Chen                                                            | USA   Los Angeles   University of Southern California                             |
| Giuseppe Stragliotto                                                      | Sweden   Stockholm   Karolinska                                                   |
| David D. Tran                                                             | USA   St. Louis, MO   Washington University Barnes-Jewish Hospital                |
| John W. Henson                                                            | USA   Seattle, WA   Swedish Neuroscience Institute                                |
| Hal Hirte                                                                 | Canada   Hamilton, ON   Juravinski Cancer Centre                                  |
| Jacob Easaw                                                               | Canada   Calgary, AB   Tom Baker Cancer Centre                                    |
| Jordi Bruna                                                               | Spain   Barcelona   Bellvitge Hospital Universitari                               |
| Carlos David                                                              | USA   Burlington, MA   Lahey Clinic                                               |
| Nam D. Tran                                                               | USA   Tampa, FL   Moffitt Cancer Center                                           |
| Herbert H. Engelhard                                                      | USA   Chicago, IL   Univ. of Illinois at Chicago (UIC)                            |
| Joseph Landolfi                                                           | USA   Edison, NJ   New Jersey Neuroscience Institute                              |
| Chae-Yong Kim                                                             | Korea   Bundang   Seoul National University Bundang Hospital (SNUBH)              |
| John Villano                                                              | USA   Lexington, KY   University of Kentucky                                      |
| Manuela Caroli                                                            | Italy   Milan   Fondazione Ospedale Maggiore Policlinico                          |
| Samuel Goldlust                                                           | USA   Hackensack, NJ   John Theurer Cancer Center at                              |

|                                      |                                                                                        |
|--------------------------------------|----------------------------------------------------------------------------------------|
|                                      | Hackensack University                                                                  |
| Tobias Walbert                       | USA   Detroit, MI   Henry Ford Health System                                           |
| Carmine Carapella                    | Italy   Rome   Istituto Nazionale dei Tumori Regina Elena                              |
| Yvonne Kew                           | USA   Houston, TX   Methodist Hospital                                                 |
| Thierry Muanza                       | Canada   Montreal, QC   Jewish General Hospital   McGill University Hospital           |
| Michael Weller and Patrick Roth      | Switzerland   Zurich   Universitaetsspital Zurich                                      |
| Wolfgang Wick                        | Germany   Heidelberg   University Hospital of Heidelberg                               |
| Juan Manuel Sepulveda                | Spain   Madrid   Hospital Universitario 12 de Octubre                                  |
| Sun-Ha Paek                          | Korea   Seoul   Seoul National University Hospital (SNUH)<br>Prof. Sun                 |
| Maximilian Mehdorn                   | Germany   Kiel   University Clinics of Schleswig-Holstein                              |
| Rajiv Desai                          | USA   Portland, ME   Maine Medical Center (MMC)                                        |
| Hassan Fathallah-Shaykh              | USA   Birmingham, AL   University of Alabama                                           |
| Garth Nicholas                       | Canada   Ottawa, ON   Ottawa Hospital, Regional Cancer Centre                          |
| Do-Hyun Nam                          | Korea   Seoul   Samsung Medical Center (SMC)                                           |
| Salvador Villa Freixa                | Spain   Badalona   ICO - Hospital Germans Trias i Pujol                                |
| Alessandro Olivi                     | USA   Baltimore, MD   The Johns Hopkins Hospital                                       |
| Andrea Salmaggi                      | Italy   Lecco   Ospedale Alessandro Manzoni                                            |
| Nicholas Avgeropoulos                | USA   Orlando, FL   MD Anderson Cancer Center Orlando                                  |
| Maciej M. Mrugala                    | USA   Seattle, WA   University of Washington Med Center                                |
| A. Waziri and Douglas E. Ney         | USA   Aurora, CO   University of Colorado School of Medicine                           |
| Ekokobe Fonkem                       | USA   Waco, TX   Scott & White Memorial Hospital                                       |
| William Read                         | USA   Atlanta, GA   Emory University                                                   |
| Jeong Hoon Kim                       | Korea   Seoul   Asan Medical Center (AMC)                                              |
| Isabelle Catry-Thomas                | France   Bordeaux   CHU Bordeaux                                                       |
| Bruno Chauffert                      | France   Amiens   CHU Amiens                                                           |
| Steven Brem                          | USA   Philadelphia, PA   Perelman School of Medicine at the University of Pennsylvania |
| Pamela New                           | USA   Houston, TX   Methodist Neurological Institute                                   |
| Alexandra Benouaich-Amiel            | France   Toulouse   Hôpital Purpan                                                     |
| Susan Pannullo                       | USA   New York, NY   Weill Cornell Medical College                                     |
| Franz Payer                          | Austria   Graz   Universitätsklinik für Neurologie                                     |
| David Schiff                         | USA   Charlottesville, VA   University of Virginia Health System                       |
| David Roberge                        | Canada   Montreal, QC   Centre Hospitalier de l'Université de Montreal                 |
| David Mathieu                        | Canada   Sherbrooke, QC   Centre Hospitalier Universitaire de Sherbrooke (CHUS)        |
| Kevin Choe                           | USA   Houston, TX   UT Southwestern Medical Center                                     |
| Jose de Campos and Daniel M. Aguirre | Spain   Madrid   Fundacion Jimenes Diaz                                                |

|                             |                                                                           |
|-----------------------------|---------------------------------------------------------------------------|
| Maria Martinez Garcia       | Spain   Barcelona   Hospital del Mar                                      |
| Yong-Kil Hong               | Korea   Seoul   The Catholic University of Korea                          |
| Se-Hyuk Kim                 | Korea   Suwon   Ajou Uni. Hospital (AUH)                                  |
| Maria de los Angeles Vaz    | Spain   Madrid   Hospital Ramon y Cajal                                   |
| Jong-Hee Chang              | Korea   Seoul   Severance Hospital                                        |
| Isabelle Germano            | USA   New York, NY   Mount Sinai School of Medicine                       |
| Herbert Newton              | USA   Columbus, OH   Ohio State University                                |
| Lynn Ashby                  | USA   Phoenix, AZ   Barrow Neurological Institute                         |
| Marshall Pitz               | Canada   Winnipeg, MB   Cancer Care Manitoba                              |
| Renato LaRocca              | USA   Louisville, KY   Norton Cancer Institute                            |
| Philip Menei                | France   Angers   CHU Angers                                              |
| Oh Lyong Kim                | Korea   Daegu   Yeungnam Uni. Hospital (YUH)                              |
| Wolfgang Grisold            | Austria   Vienna   Kaiser-Franz-Josef-Spital                              |
| Massimo Scerrati            | Italy   Ancona   Ospedali Riuniti di Ancona                               |
| Jing Wu                     | USA   Chapel Hill, NC   University of North Carolina at Chapel Hill (UNC) |
| Jana Portnow                | USA   Duarte, CA   City of Hope                                           |
| Hwan Jung Yun               | Korea   Daejeon   Chungnam National Uni. Hospital (CNUH)                  |
| Estela Pineda               | Spain   Barcelona   Hospital Clinic i Provincial                          |
| Pedro Perez Segura          | Spain   Madrid   Hospital Clinico San Carlos                              |
| Andrew Lassman              | USA   New York, NY   Columbia University                                  |
| Manfred Westphal            | Germany   Hamburg   Universitätsklinikum Hamburg-Eppendorf                |
| Scott Owen                  | Canada   Montreal, QC   Montreal Neurological Institute (McGill)          |
| Jaime Gallego Perez-Larraya | Spain   Pamplona   Clinica Universitaria de Navarra                       |
| Christine Marosi            | Austria   Vienna   Allgemeines Krankenhaus der Stadt Wien                 |
